# Supplementary material for: The protein kinase Sch9 is a key regulator of sphingolipid metabolism in Saccharomyces cerevisiae
Source: PubMed Central journal article supplement — Mol Biol Cell. 2014 Jan 1;25(1):196–211. doi: 10.1091/mbc.E13-06-0340 (PMC3873890; doi:10.1091/mbc.e13-06-0340), 2014-01-01
Supplement: supp_E13-06-0340v1_CombinedSupMats.pdf [file supp_E13-06-0340v1_CombinedSupMats.pdf]

# Supplemental Materials

*Molecular Biology of the Cell*

Swinnen et al.

## SUPPLEMENTARY DATA

### SUPPLEMENTARY TABLES

**Table S1: Strains used in this study.**

| Name                     | Genotype and markers                                            | Reference                      |
|--------------------------|-----------------------------------------------------------------|--------------------------------|
| W303-1A (WT)             | MATa <i>ade2-1 can1-100 his3-11,15 leu2-3,112 trp1-1 ura3-1</i> | (Thomas and Rothstein, 1989)   |
| JW 00 145                | MATa <i>ade2-1 can1-100 his3-11,15 leu2-3,112 trp1-1 ura3-1</i> | (Thomas and Rothstein, 1989)   |
| BS_188                   | W303-1A <i>TRP1+</i>                                            | This study                     |
| JW 00 035                | W303-1A with <i>sch9::TRP1</i>                                  | (Roosen <i>et al.</i> , 2005)  |
| JW 01 418                | W303-1A with <i>sch9::NATMX4</i>                                | This study                     |
| BY4741 (WT)              | MATa <i>his3Δ1 leu2Δ0 ura3Δ0 met15Δ0</i>                        | Y.K.O. Collection              |
| BY4742                   | MATa <i>his3Δ1 leu2Δ0 ura3Δ0 lys2Δ0</i>                         | Y.K.O. Collection              |
| JW 01 306                | BY4741 with <i>sch9::HIS3</i>                                   | (Swinnen <i>et al.</i> , 2005) |
| JW 03 038                | BY4741 with <i>sch9::NATMX4</i>                                 | This study                     |
| <i>isc1Δ</i>             | BY4741 with <i>isc1::KANMX4</i>                                 | Y.K.O. Collection              |
| <i>sur2Δ</i>             | BY4742 with <i>sur2::KANMX4</i>                                 | Y.K.O. Collection              |
| <i>lcb4Δ</i>             | BY4742 with <i>lcb4::KANMX4</i>                                 | Y.K.O. Collection              |
| <i>lcb5Δ</i>             | BY4742 with <i>lcb5::KANMX4</i>                                 | Y.K.O. Collection              |
| <i>lcb3Δ</i>             | BY4742 with <i>lcb3::KANMX4</i>                                 | Y.K.O. Collection              |
| <i>ysr3Δ</i>             | BY4742 with <i>ysr3::KANMX4</i>                                 | Y.K.O. Collection              |
| <i>lag1Δ</i>             | BY4742 with <i>lag1::KANMX4</i>                                 | Y.K.O. Collection              |
| <i>lac1Δ</i>             | BY4742 with <i>lac1::KANMX4</i>                                 | Y.K.O. Collection              |
| <i>sur4Δ</i>             | BY4742 with <i>sur4::KANMX4</i>                                 | Y.K.O. Collection              |
| <i>ydc1Δ</i>             | BY4742 with <i>ydc1::KANMX4</i>                                 | Y.K.O. Collection              |
| <i>ypc1Δ</i>             | BY4742 with <i>ypc1::KANMX4</i>                                 | Y.K.O. Collection              |
| <i>csg2Δ</i>             | BY4742 with <i>csg2::KANMX4</i>                                 | Y.K.O. Collection              |
| <i>sur1Δ</i>             | BY4742 with <i>sur1::KANMX4</i>                                 | Y.K.O. Collection              |
| <i>ipt1Δ</i>             | BY4742 with <i>ipt1::KANMX4</i>                                 | Y.K.O. Collection              |
| <i>isc1Δ</i>             | BY4742 with <i>isc1::KANMX4</i>                                 | Y.K.O. Collection              |
| <i>svf1Δ</i>             | BY4742 with <i>svf1::KANMX4</i>                                 | Y.K.O. Collection              |
| <i>sch9Δ sur2Δ</i>       | BY with <i>sch9::HIS3 sur2::KANMX4</i>                          | This study <sup>(1)</sup>      |
| <i>sch9Δ lcb4Δ</i>       | BY with <i>sch9::HIS3 lcb4::KANMX4</i>                          | This study <sup>(1)</sup>      |
| <i>sch9Δ lcb5Δ</i>       | BY with <i>sch9::HIS3 lcb5::KANMX4</i>                          | This study <sup>(1)</sup>      |
| <i>sch9Δ lcb4Δ lcb5Δ</i> | BY with <i>sch9::HIS3 lcb4::KANMX4 lcb5::KANMX4</i>             | This study <sup>(1)</sup>      |
| <i>sch9Δ lcb3Δ</i>       | BY with <i>sch9::HIS3 lcb3::KANMX4</i>                          | This study <sup>(1)</sup>      |
| <i>sch9Δ ysr3Δ</i>       | BY with <i>sch9::HIS3 ysr3::KANMX4</i>                          | This study <sup>(1)</sup>      |
| <i>sch9Δ lcb3Δ ysr3Δ</i> | BY with <i>sch9::HIS3 lcb3::KANMX4 ysr3::KANMX4</i>             | This study <sup>(1)</sup>      |
| <i>sch9Δ lac1Δ</i>       | BY with <i>sch9::HIS3 lac1::KANMX4</i>                          | This study <sup>(1)</sup>      |
| <i>sch9Δ lag1Δ</i>       | BY with <i>sch9::HIS3 lag1::KANMX4</i>                          | This study <sup>(1)</sup>      |
| <i>sch9Δ sur4Δ</i>       | BY with <i>sch9::HIS3 sur4::KANMX4</i>                          | This study <sup>(1)</sup>      |
| <i>sch9Δ ydc1Δ</i>       | BY with <i>sch9::HIS3 ydc1::KANMX4</i>                          | This study <sup>(1)</sup>      |
| <i>sch9Δ ypc1Δ</i>       | BY with <i>sch9::HIS3 ypc1::KANMX4</i>                          | This study <sup>(1)</sup>      |
| <i>sch9Δ csg2Δ</i>       | BY with <i>sch9::HIS3 csg2::KANMX4</i>                          | This study <sup>(1)</sup>      |
| <i>sch9Δ sur1Δ</i>       | BY with <i>sch9::HIS3 sur1::KANMX4</i>                          | This study <sup>(1)</sup>      |
| <i>sch9Δ ipt1Δ</i>       | BY with <i>sch9::HIS3 ipt1::KANMX4</i>                          | This study <sup>(1)</sup>      |
| <i>sch9Δ isc1Δ</i>       | BY with <i>sch9::HIS3 isc1::KANMX4</i>                          | This study <sup>(1)</sup>      |
| <i>sch9Δ svf1Δ</i>       | BY with <i>sch9::HIS3 svf1::KANMX4</i>                          | This study <sup>(1)</sup>      |
| JW 04 601                | BY4741 with C-terminal 9MYC tagged <i>LAG1</i>                  | This study <sup>(2)</sup>      |
| JW 04 602                | JW 03 038 with C-terminal 9MYC tagged <i>LAG1</i>               | This study <sup>(2)</sup>      |
| JW 04 603                | BY4741 with C-terminal 9MYC tagged <i>LAC1</i>                  | This study <sup>(2)</sup>      |

|           |                                                   |                           |
|-----------|---------------------------------------------------|---------------------------|
| JW 04 604 | JW 03 038 with C-terminal 9MYC tagged <i>LAC1</i> | This study <sup>(2)</sup> |
| JW 04 606 | BY4741 with C-terminal 9MYC tagged <i>ISC1</i>    | This study <sup>(2)</sup> |
| JW 04 607 | JW 03 038 with C-terminal 9MYC tagged <i>ISC1</i> | This study <sup>(2)</sup> |
| JW 04 610 | BY4741 with C-terminal 9MYC tagged <i>YDC1</i>    | This study <sup>(2)</sup> |
| JW 04 612 | JW 03 038 with C-terminal 9MYC tagged <i>YDC1</i> | This study <sup>(2)</sup> |
| JW 04 613 | BY4741 with C-terminal 9MYC tagged <i>YPC1</i>    | This study <sup>(2)</sup> |
| JW 04 615 | JW 03 038 with C-terminal 9MYC tagged <i>YPC1</i> | This study <sup>(2)</sup> |

<sup>(1)</sup> Strains were created by crossing JW 01 306 (BY4741 with *sch9::HIS3*) with BY4742 strains containing the desired *KANMX4* deletions, followed by sporulation and tetrad dissection. Triple deletion strains were made using appropriate single and double deletion strains for crossing and sporulation.

<sup>(2)</sup> For C-terminal 9Myc tagging, the Euroscarf plasmid pYM20 (9Myc tag, hphNT1 marker) was used as a template for PCR using primers containing 60bp overlap with the region directly before and after the stop codon of the target gene, as described in (Janke *et al.*, 2004). Transformants were selected on hygromycin B containing medium and checked with colony PCR for correct integration of the 9Myc tag.

**Table S2: Plasmids used in this study.**

| Name              | backbone  | insert                                        | marker      | Reference                              |
|-------------------|-----------|-----------------------------------------------|-------------|----------------------------------------|
| FBp87             | Yeplac195 | <i>p<sub>SCH9pr</sub>-SCH9</i>                | <i>URA3</i> | (Reinders <i>et al.</i> , 1998)        |
| pCUP- <i>LAG1</i> | pYEX 4T-1 | <i>pCUP1pr-GST-LAG1</i>                       | <i>URA3</i> | (Martzen <i>et al.</i> , 1999)         |
| pCUP- <i>LAC1</i> | pYEX 4T-1 | <i>pCUP1pr-GST-LAG1</i>                       | <i>URA3</i> | (Martzen <i>et al.</i> , 1999)         |
| FBp431            | pYES2     | <i>ISC1-GFPuv</i>                             | <i>URA3</i> | (Vaena de Avalos <i>et al.</i> , 2004) |
| FBp459            | pHS12     | <i>p<sub>ADHpr</sub>-preCox4-mCherry</i>      | <i>LEU2</i> | Addgene 25444 (Benjamin Glick)         |
| FBp701            | YEpl357   | <i>LAG1</i> promoter (-780/+30)               | <i>URA3</i> | this study                             |
| FBp702            | YEpl357   | <i>LAC1</i> promoter (-750/+18)               | <i>URA3</i> | this study                             |
| FBp703            | YEpl357   | <i>YDC1</i> promoter (-750/+30)               | <i>URA3</i> | this study                             |
| FBp704            | YEpl357   | <i>YPC1</i> promoter (-750/+30)               | <i>URA3</i> | this study                             |
| FBp705            | pRS415    | <i>p<sub>SCH9pr</sub>-SCH9</i>                | <i>LEU2</i> | this study                             |
| FBp706            | pRS415    | <i>p<sub>SCH9pr</sub>-SCH9<sup>5A</sup></i>   | <i>LEU2</i> | this study                             |
| FBp707            | pRS415    | <i>p<sub>SCH9pr</sub>-SCH9<sup>2D3E</sup></i> | <i>LEU2</i> | this study                             |
| FBp708            | pRS426    | <i>p<sub>ISC1pr</sub>-ISC1-GFPuv</i>          | <i>URA3</i> | this study                             |
| FBp709            | pYX242    | <i>KAR2<sub>(1→135)</sub>-mCherry-HDEL</i>    | <i>LEU2</i> | this study                             |

**Table S3: Primers used in this study.**

| Name        | sequence                                                                                                                 |
|-------------|--------------------------------------------------------------------------------------------------------------------------|
| LAG1-lacZfw | CCGGGATCCGATCTGTTGCCTTCAACAGTGCATTCC (bp -780 → -754, BamHI)                                                             |
| LAG1-lacZRv | CCGGTCGACATCGATAGATTTGTCCGTAGCTGATGTC (bp 30 → 3, Sall)                                                                  |
| LAC1-lacZfw | CCGGGATCCTTTCTGTGCTCTTATGATCCGTTGG (bp -750 → -725, BamHI)                                                               |
| LAC1-lacZRv | CCGGTCGACTGGCTTTATTGTGGACATAGCTCTTGTATTGATACTGTG (bp 18 → -21, (bp6 mutated (C→G) to remove endogenous Sall site), Sall) |
| YDC1-lacZfw | CCGGGATCCACGGACAGGATTAAGAGTGATCC (bp -750 → -727, BamHI)                                                                 |

YDC1-lacZRv CCGGTCGACGGCTTCTGGATAAGGCCAGCTGAACAGC (bp 30 → 3, Sall)

YPC1-lacZFw CCGGGATCCTGCGTAGTGTGAGTGCCACTAG (bp -750 → -729, BamHI)

YPC1-lacZRv CCGGTCGACCTTCTGGATAGTTCCAACGAAATATTCCC (bp 30 → 3, Sall)

ISC1-fus1 ccgggccccccctcaggtcgacggatcgataagcttgatcgGCCGCGAGGTCGCCCTGGACGG (ISC1:  
bp -795 → -774)

ISC1-RVC GAGTCTTTCTTTACGGTGTGG (ISC1: bp 180 → 158)

ISC1-fus5 ATGTACAACAGAAAAGACAGAGATG (ISC1: bp 1 → 25)

ISC1-fus4 gcggtggcggccgctctagaactagtgatccccgggctgcaggGCAAATTAAGCCTTCGAGCG  
(CYC1ter: bp 248 → 229)

KAR2-F1 gaattccatggatcctagggcccacaagcttacgcgctgacccgggATGTTTTTCAACAGACTAAGCGC  
(KAR2: bp 1 → 23)

KAR2-F2 gaactccttgatgatggccatgtatcctcctcgccctgctcacATCATCGGCACCTCTAACTAAAAC  
(KAR2: bp 135 → 112)

mCherry-F1 aattcttccactcctcaatgttttagtagaggtgccgatgatGTGAGCAAGGGCGAGGAGG  
(mCherry 4 → 22)

mCherry-F2 ggaaaaacgttcattgttccttattcagttagctagctgagctcgagatatctcagagctcctcgtg  
CTTGACAGCTCGTCCATGC (mCherry: bp 705 → 686)

## SUPPLEMENTARY FIGURES

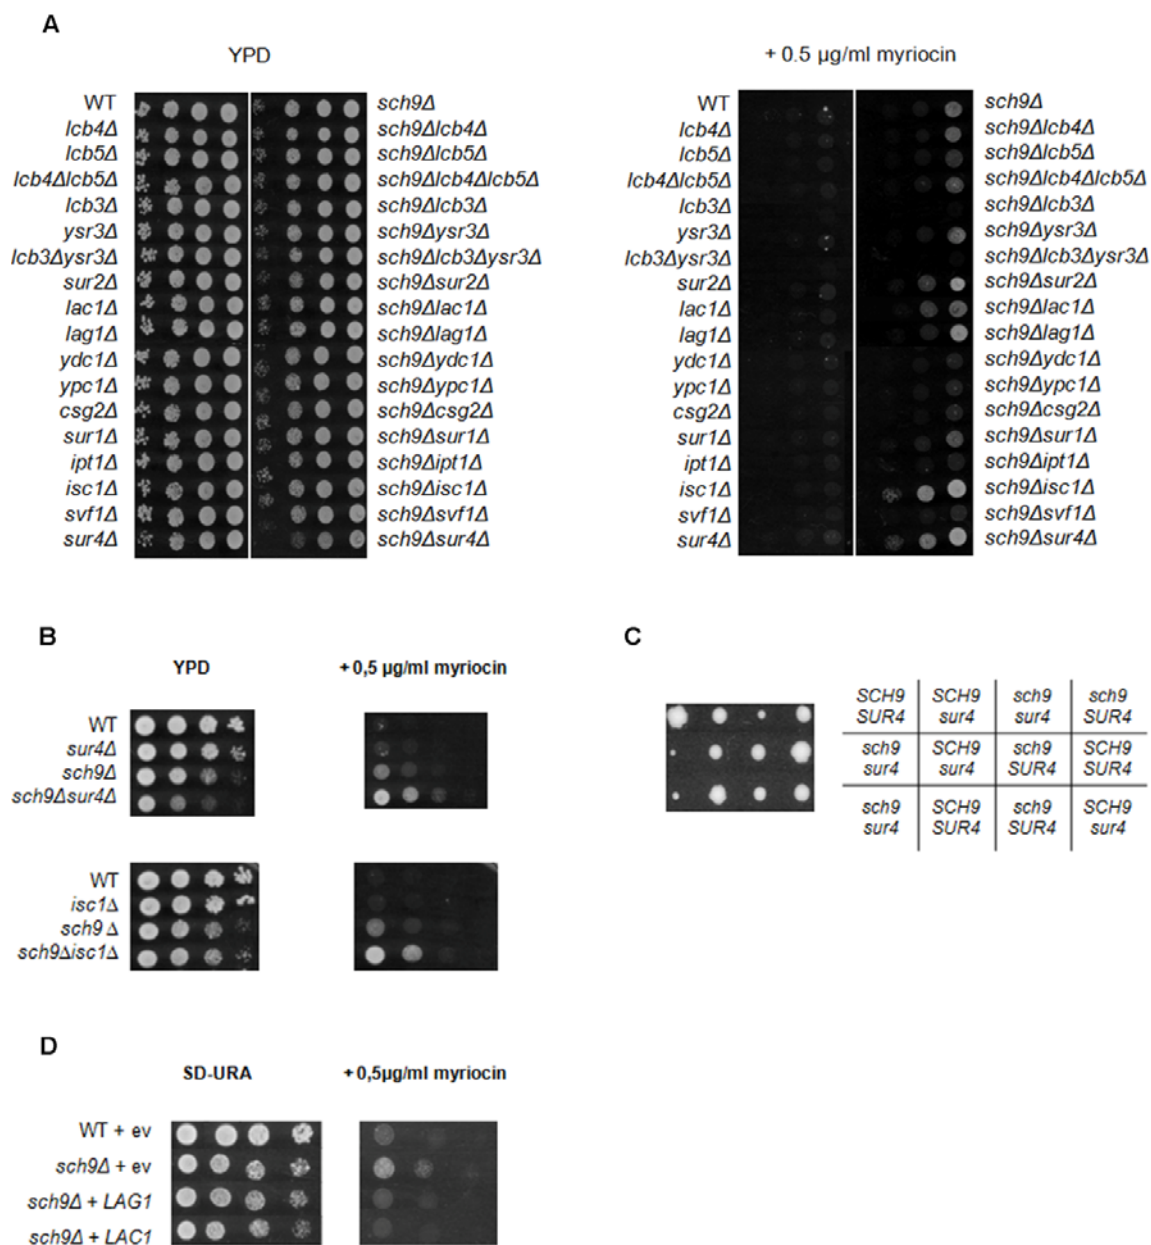

**Figure S1: Genetic interaction of *SCH9* with enzymes involved in sphingolipid metabolism.**

(A) Serial dilutions of exponential growing wild type, single, double and triple deletion strains on YPD medium with or without the addition of 0.5 µg/ml myriocin. The wild type and the single and double deletion mutants with a BY background are segregants from a diploid strain, created by crossing the *sch9Δ* (JW 01 306; background BY4741) strain with the respective single deletion strains with background BY4742. Triple deletions are segregants from a diploid strain, created by crossing a double deletion mutant with the single deletion mutant carrying the third deletion. (B) Additional deletion of *SUR4* or *ISC1* in the *sch9Δ* strain increases myriocin resistance. Double deletion strains were spotted directly below the *sch9Δ* strain, to better observe the increase in myriocin resistance. (C) Synthetic sick phenotype of a *sch9Δ sur4Δ* strain. Diploid cells, heterozygous for *SCH9* and *SUR4* were sporulated, and tetrads were dissected on YPD (in horizontal rows). Genotypes are indicated. (D) Overexpression of the ceramide synthases *LAG1* or *LAC1* suppresses the myriocin

resistance of the *sch9Δ* strain. Spottest on SD-URA with or without addition of myriocin of the WT (BY4741) and the *sch9Δ* strain (JW 03 038) transformed with plasmids with Cu<sup>2+</sup> inducible over-expression of *LAC1* and *LAG1* (Martzen *et al.*, 1999) or an empty vector (ev).

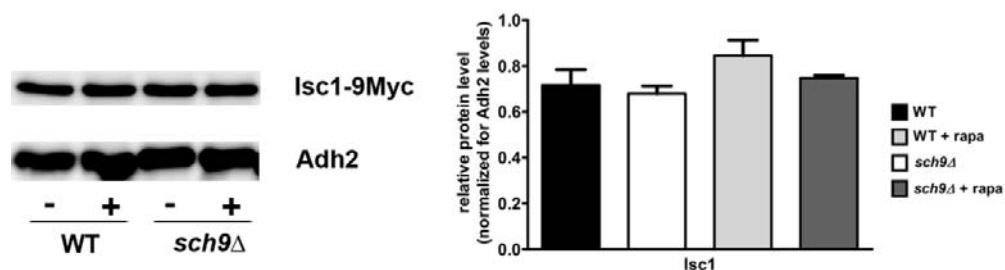

**Figure S2: Deletion of *SCH9* or rapamycin treatment of cells does not affect *Isc1* protein levels.**

The gene encoding the inositol phosphosphingolipid phospholipase C (*ISC1*) was genomically tagged with a 9Myc tag in both WT BY4741 and *sch9Δ* (JW 03 038) strains. Overnight precultures were inoculated at an initial OD600 of 0.3 and grown to OD600 2.0, after which a sample was withdrawn for protein extraction (noted as -). The remainder of the culture was treated with 200nM rapamycin and grown for an additional hour, after which a second sample for protein extraction was taken (noted as +). After TCA protein extraction, equal protein amounts were run on a SDS-PAGE. The tagged enzyme was detected using an anti-Myc antibody, the yeast *Adh2* serves as an internal control. A representative result for the western blot is shown in (A). Signals for Myc detection were quantified and normalized for *Adh2* levels. Average results of two independent cultures are shown in (B), with standard deviations noted as error bars.

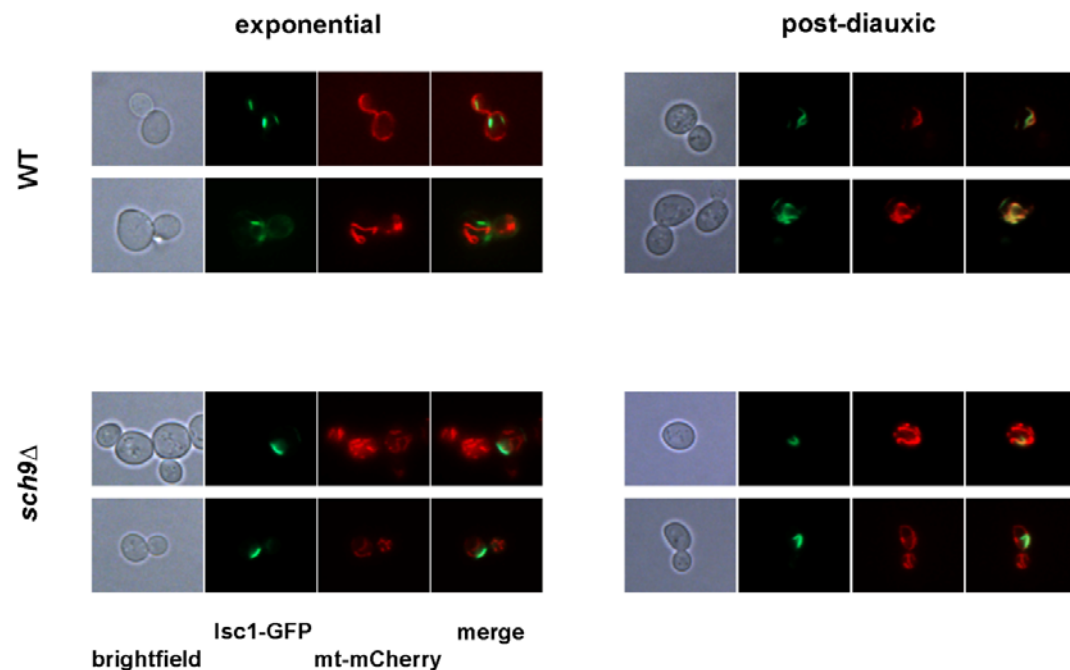

**Figure S3: Mitochondrial translocation of *Isc1* on galactose medium is impaired in the absence of *Sch9*.**

Wild type (BY4741) and *sch9Δ* (JW 01 306) expressing *Isc1*-GFP (from a galactose-inducible promoter, plasmid FBp431) and a red fluorescent mitochondrial marker protein (plasmid FBp459, containing fluorescent mCherry targeted to the mitochondria by the *Cox4* presequence) were grown in YPGAL medium and localization was analyzed at the early exponential and post-diauxic growth phase using fluorescence microscopy. Bright field, single channel and the corresponding merge are shown for both growth phases. Representative pictures are shown.

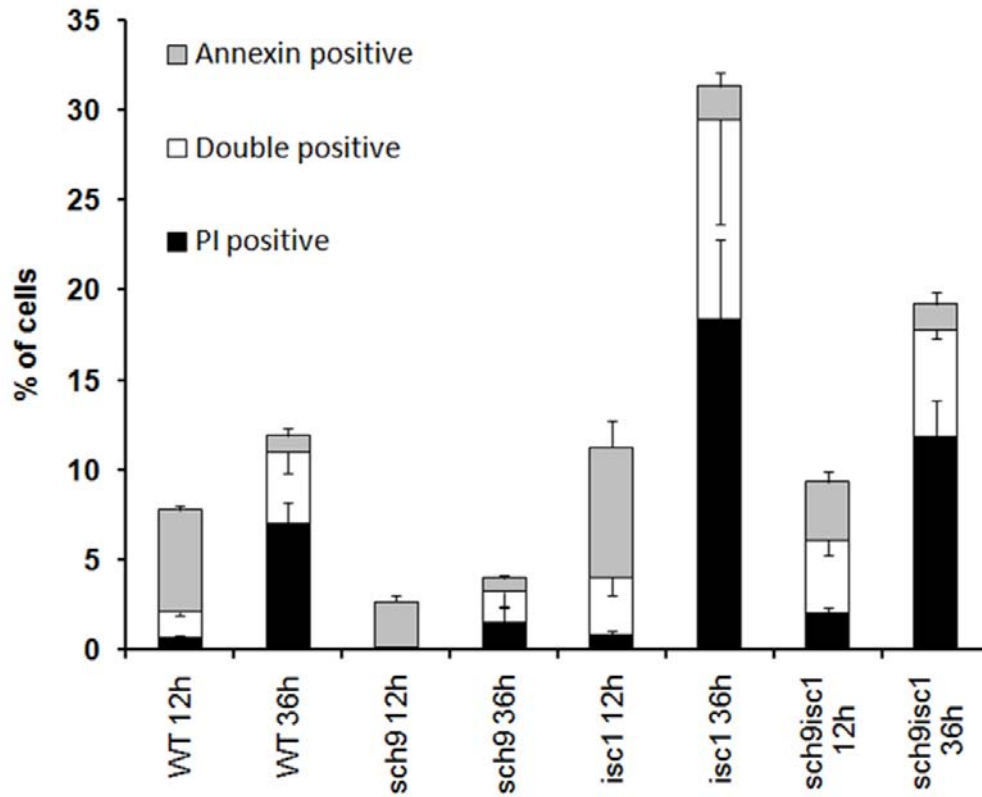

**Figure S4: Sch9 and Isc1 modulate apoptotic cell death.**

Tests for cell death markers of apoptosis and necrosis (Annexin/PI co-staining) were performed as described by (Buttner *et al.*, 2008). The wild type (BY4741), *sch9Δ* (JW 01 306), *isc1Δ* and *sch9Δisc1Δ* strains were inoculated in fresh synthetic complete medium at an OD600 0,1. After 12h (exponential phase) and 36h (post-diauxic phase) cells were stained using Annexin-V-FITC and propidium iodide (PI), to detect phosphatidyl serine externalization and loss of membrane integrity, respectively, as described by (Buttner *et al.*, 2008). Quantitative flow cytometric analysis, using a BD influx flow cytometer, on the apoptotic/necrotic markers was performed and analysis was carried out using FlowJo software. Results depicted are mean values  $\pm$  SD of three independent cultures.

## SUPPLEMENTARY REFERENCES

- Buttner, S., Bitto, A., Ring, J., Augsten, M., Zabrocki, P., Eisenberg, T., Jungwirth, H., Hutter, S., Carmona-Gutierrez, D., Kroemer, G., Winderickx, J., and Madeo, F. (2008). Functional mitochondria are required for alpha-synuclein toxicity in aging yeast. *J Biol Chem* 283, 7554-7560.
- Janke, C., Magiera, M.M., Rathfelder, N., Taxis, C., Reber, S., Maekawa, H., Moreno-Borchart, A., Doenges, G., Schwob, E., Schiebel, E., and Knop, M. (2004). A versatile toolbox for PCR-based tagging of yeast genes: new fluorescent proteins, more markers and promoter substitution cassettes. *Yeast* 21, 947-962.
- Martzen, M.R., McCraith, S.M., Spinelli, S.L., Torres, F.M., Fields, S., Grayhack, E.J., and Phizicky, E.M. (1999). A biochemical genomics approach for identifying genes by the activity of their products. *Science* 286, 1153-1155.
- Reinders, A., Burckert, N., Boller, T., Wiemken, A., and De Virgilio, C. (1998). *Saccharomyces cerevisiae* cAMP-dependent protein kinase controls entry into stationary phase through the Rim15p protein kinase. *Genes Dev* 12, 2943-2955.
- Roosen, J., Engelen, K., Marchal, K., Mathys, J., Griffioen, G., Cameroni, E., Thevelein, J.M., De Virgilio, C., De Moor, B., and Winderickx, J. (2005). PKA and Sch9 control a molecular switch important for the proper adaptation to nutrient availability. *Mol Microbiol* 55, 862-880.
- Swinnen, E., Rosseels, J., and Winderickx, J. (2005). The minimum domain of Pho81 is not sufficient to control the Pho85-Rim15 effector branch involved in phosphate starvation-induced stress responses. *Curr Genet* 48, 18-33.
- Thomas, B.J., and Rothstein, R. (1989). Elevated recombination rates in transcriptionally active DNA. *Cell* 56, 619-630.
- Vaena de Avalos, S., Okamoto, Y., and Hannun, Y.A. (2004). Activation and localization of inositol phosphosphingolipid phospholipase C, Isc1p, to the mitochondria during growth of *Saccharomyces cerevisiae*. *J Biol Chem* 279, 11537-11545.
